# Supplementary material for: Quantification of methane sources in the Athabasca Oil Sands Region of Alberta by aircraft mass balance
Source: Copernicus journal article supplement (doi:10.5194/acp-18-7361-2018), 2018-05-28

Supplement of Atmos. Chem. Phys., 18, 7361–7378, 2018  
<https://doi.org/10.5194/acp-18-7361-2018-supplement>  
© Author(s) 2018. This work is distributed under  
the Creative Commons Attribution 4.0 License.

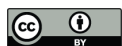

*Supplement of*

## **Quantification of methane sources in the Athabasca Oil Sands Region of Alberta by aircraft mass balance**

**Sabour Baray et al.**

*Correspondence to:* Robert McLaren (rmclaren@yorku.ca) and Katherine L. Hayden (katherine.hayden@canada.ca)

The copyright of individual parts of the supplement might differ from the CC BY 4.0 License.

## Assessment of Uncertainties

Tables S1-6 show the results of the sensitivity analysis to estimate contributions to total uncertainty. Parameters contributing to uncertainties depend on the mass balance method used and the screen-based (Eq. 1) or the box-approach (Eq. 2). Minor uncertainties that contribute to both methods are errors in the CH<sub>4</sub> mixing ratio measurement and wind measurements. CH<sub>4</sub> measurement errors from the instrument are <1%. Measurements of trace species from other instruments were used qualitatively to deduce plume origins, thus they do not contribute to total uncertainties. In a previous study, a Monte Carlo simulation was used to demonstrate the wind measurements contribute <1% to the change in uncertainties (Gordon et al., 2016). A significant source of uncertainty for both mass balance methods is the extrapolation of CH<sub>4</sub> mixing ratios to the surface for ground-level plumes. Surface extrapolation uncertainties are highly variable with flight, consistent with the literature. Cambaliza et al. (2014) found surface extrapolation uncertainties to be 4, 9 and 16% for three different mass balance flights downwind of Indianapolis to determine CH<sub>4</sub> fluxes, and Gordon et al., 2016 found this to be 15% and 26% for two Oil Sands flights for the CNRL facility. The uncertainty depends on the range of surface mixing ratios resulting from fitting varying extrapolation methods. We derive a range of possible emissions rates by comparing results from constant, linear and half-Gaussian extrapolations to the surface. CH<sub>4</sub> measurements at Fort McKay are used as constraints on surface mixing ratios when flight paths are directly overhead (Aug 16 Flight 4A, SML and SUN). Half-gaussian extrapolations are used where fits are above constraints ( $r^2 > 0.40$ ). Future studies can further minimize these uncertainties with simultaneous ground-level mixing ratio measurements.

Additional uncertainties specific to the box-approach (Eq. 2) are assessed according to the methodology described in Gordon et al., 2016. Contributing factors are: (1) the uncertainty in the box-top height (affecting the  $E_{CH}$  and  $E_{CV}$  terms), estimated by reducing the box height by 100 m, (2) changes in air mass density within the volume of the box (affecting  $E_{CM}$ ), estimated using the minimum and maximum of pressure and temperature ratios derived from surrounding meteorological stations, (3) inclusion of the estimated vertical turbulence term ( $E_{CVT}$ ), and (4) uncertainty in the mean CH<sub>4</sub> mixing ratio at the

box-top (affecting  $E_{CV}$ ) determined from the 95% confidence interval ( $2\sigma/\sqrt{n}$ ) of interpolated measurements. These terms are recalculated according to the range of possible input parameters in order to derive resulting uncertainties in the emissions rates. Screen-approach specific uncertainties (Eq. 1) are mostly due to the variability in the background mixing ratio  $[CH_4]_B$ , determined using the outer edges of the screen away from plume sources (screen flights) and upwind measurements (box flights). For each flight measurements from multiple background regions ( $>1\text{km}$ ) occurring closely in time are used as possible inputs, which are identified clearly due to the high  $CH_4$  mixing ratios observed from plumes. Other sources of uncertainty are the vertical extent of the screen (upper bound,  $z$ ) and the horizontal boundaries ( $s_1$ - $s_2$ ) of individually characterized plumes. These plume boundaries are expanded and contracted to derive a range of possible integrals.

Uncertainties for each mass balance flight are added in quadrature to derive a range of possible emissions rates. Estimates for the same source category within a facility, as well as total estimates for the same facility, are treated as independent estimates and combined using an error-weighted mean ( $1/\sigma^2$ ).

### **Meteorological Conditions**

Tables S1-6 (bottom) present various flight details and meteorology. Flights used are those with a high number of aircraft transects ( $\geq 6$ ) that show full characterization of plume vertical extent. Boundary layer heights are determined using visual inspection of dew point temperature alongside LIDAR backscatter reports from ground-site AMS13 during flight times. Ground temperature and wind direction measurements are based on ground-site data at AMS13 over the course of the day. Wind speeds shown are from interpolated screens  $\pm 1\sigma$ .

25

**Table S1-6: Top: Sensitivity analysis displaying uncertainty contributions ( $1\sigma$ ) shown in percent change from the best-estimate emissions rate, added in quadrature for totals. Uncertainties in**

**individual plumes are noted with superscripts for tailings ponds (t), mines (m) and facility/other (f). Screen estimates using an overlapping subset of downwind measurements from a box flight of the same day are shown with an asterisk (\*). Middle: List of emissions rates for source categories and facility totals in tonnes CH<sub>4</sub> per hour (tonnes hr<sup>-1</sup>). Bottom: Various aircraft flight details and meteorological parameters.**

**Table S1: Syncrude Mildred Lake (SML)**

|                                                          | Aug 14 Box         | Aug 14<br>Screen A*               | Aug 14 Screen<br>B                | Aug 16 Screen<br>A                |
|----------------------------------------------------------|--------------------|-----------------------------------|-----------------------------------|-----------------------------------|
| Measurement Error (%)                                    | 1                  | 1                                 | 1                                 | 1                                 |
| Wind Error (%)                                           | 1                  | 1                                 | 1                                 | 1                                 |
| Surface Extrapolation (%)                                | 4                  | 11                                | 3                                 | 28                                |
| Box-top Height (%)                                       | 15                 |                                   |                                   |                                   |
| Box Density Change (%)                                   | 11                 |                                   |                                   |                                   |
| Box Vertical Turbulence (%)                              | 2                  |                                   |                                   |                                   |
| Box-Top Mixing Ratio (%)                                 | <b>4</b>           |                                   |                                   |                                   |
| Background Mixing Ratio (%)                              |                    | 13                                | 19                                | 8                                 |
| Screen Screen-Top Height (%)                             |                    | 6                                 | 6                                 | 1                                 |
| Screen Plume Separation (%)                              |                    | 6 <sup>t</sup> , 11 <sup>m</sup>  | 5 <sup>t</sup> , 12 <sup>m</sup>  | 5 <sup>t</sup> , 8 <sup>m</sup>   |
| Total Uncertainty Facility (%)                           | 20                 | 19                                | 21                                | 30                                |
| Total Uncertainty Plumes (%)                             |                    | 20 <sup>t</sup> , 22 <sup>m</sup> | 21 <sup>t</sup> , 24 <sup>m</sup> | 30 <sup>t</sup> , 31 <sup>m</sup> |
| Emissions Rate Ponds (tonnes hr <sup>-1</sup> )          |                    | 6.38 ± 1.23                       | 5.83 ± 1.22                       | 8.63 ± 2.59                       |
| Emissions Rate Mines (tonnes hr <sup>-1</sup> )          |                    | 2.71 ± 0.60                       | 2.67 ± 0.64                       | 3.07 ± 0.95                       |
| Emissions Rate Facility/Other (tonnes hr <sup>-1</sup> ) |                    |                                   |                                   |                                   |
| <b>Emissions Rate Total (tonnes hr<sup>-1</sup>)</b>     | <b>7.68 ± 1.54</b> | <b>9.10 ± 1.73</b>                | <b>8.50 ± 1.79</b>                | <b>11.82 ± 3.55</b>               |
| Aircraft Transect Count                                  | 6                  | 6                                 | 8                                 | 9                                 |
| Boundary Layer Height (m agl)                            | 360-400            | 360-400                           | 400-600                           | 350-400                           |
| Temperature (°C)                                         | 20.8 ± 6.0         | 20.8 ± 6.0                        | 20.8 ± 6.0                        | 19.5 ± 3.8                        |
| Wind Speed (m/s)                                         | 3.1 ± 2.5          | 3.1 ± 2.5                         | 5.1 ± 1.6                         | 2.8 ± 0.8                         |
| Daily Mean Wind Direction (°)                            | 220 ± 37           | 220 ± 37                          | 220 ± 37                          | 225 ± 57                          |

**Table S2: Suncor Energy OSG (SUN)**

|                                                          | Aug 16 Screen A                   | Aug 29 Box         | Aug 29 Screen*                    |
|----------------------------------------------------------|-----------------------------------|--------------------|-----------------------------------|
| Measurement Error (%)                                    | 1                                 | 1                  | 1                                 |
| Wind Error (%)                                           | 1                                 | 1                  | 1                                 |
| Surface Extrapolation (%)                                | 4                                 | 14                 | 4                                 |
| Box-top Height (%)                                       |                                   | 1                  |                                   |
| Box Density Change (%)                                   |                                   | 17                 |                                   |
| Box Vertical Turbulence (%)                              |                                   | 2                  |                                   |
| Box-Top Mixing Ratio (%)                                 |                                   | 5                  |                                   |
| Background Mixing Ratio (%)                              | 23                                |                    | 2                                 |
| Screen Screen-Top Height (%)                             | 1                                 |                    | 9                                 |
| Screen Plume Separation (%)                              | 12 <sup>t</sup> , 1 <sup>m</sup>  |                    | 9 <sup>t</sup> , 9 <sup>m</sup>   |
| Total Uncertainty Facility (%)                           | 24                                | 23                 | 11                                |
| Total Uncertainty Plumes (%)                             | 27 <sup>t</sup> , 24 <sup>m</sup> |                    | 14 <sup>t</sup> , 14 <sup>m</sup> |
| Emissions Rate Ponds (tonnes hr <sup>-1</sup> )          | 3.16 ± 0.85                       |                    | 2.30 ± 0.32                       |
| Emissions Rate Mines (tonnes hr <sup>-1</sup> )          | 1.53 ± 0.37                       |                    | 1.88 ± 0.26                       |
| Emissions Rate Facility/Other (tonnes hr <sup>-1</sup> ) |                                   |                    |                                   |
| <b>Emissions Rate Total (tonnes hr<sup>-1</sup>)</b>     | <b>4.69 ± 1.13</b>                | <b>3.96 ± 0.91</b> | <b>4.18 ± 0.42</b>                |
| Aircraft Transect Count                                  | 9                                 | 7                  | 7                                 |
| Boundary Layer Height (m agl)                            | 350-400                           | 400-500            | 400-500                           |
| Temperature (°C)                                         | 19.5 ± 3.8                        | 15.2 ± 2.4         | 15.2 ± 2.4                        |
| Wind Speed (m/s)                                         | 2.8 ± 0.8                         | 1.8 ± 1.3          | 1.8 ± 1.3                         |
| Daily Mean Wind Direction (°)                            | 225 ± 57                          | 26 ± 40            | 26 ± 40                           |

5

10

**Table S3: Canadian National Resources Limited Horizon (CNRL)**

|                                                          | Aug 20 Box         | Aug 20 Screen*     | Sep 02 Box         | Sep 02 Screen*                    |
|----------------------------------------------------------|--------------------|--------------------|--------------------|-----------------------------------|
| Measurement Error (%)                                    | 1                  | 1                  | 1                  | 1                                 |
| Wind Error (%)                                           | 1                  | 1                  | 1                  | 1                                 |
| Surface Extrapolation (%)                                | 22                 | 26                 | 12                 | 11                                |
| Box-top Height (%)                                       | 1                  |                    | 18                 |                                   |
| Box Density Change (%)                                   | 5                  |                    | 6                  |                                   |
| Box Vertical Turbulence (%)                              | 2                  |                    | 7                  |                                   |
| Box-Top Mixing Ratio (%)                                 | 3                  |                    | 8                  |                                   |
| Background Mixing Ratio (%)                              |                    | 16                 |                    | 25                                |
| Screen Screen-Top Height (%)                             |                    | 5                  |                    | 2                                 |
| Screen Plume Separation (%)                              |                    |                    |                    | 6 <sup>m</sup> , 12 <sup>f</sup>  |
| Total Uncertainty Facility (%)                           | 23                 | 31                 | 25                 | 28                                |
| Total Uncertainty Plumes (%)                             |                    |                    |                    | 29 <sup>m</sup> , 30 <sup>f</sup> |
| Emissions Rate Ponds (tonnes hr <sup>-1</sup> )          |                    |                    |                    |                                   |
| Emissions Rate Mines (tonnes hr <sup>-1</sup> )          |                    |                    |                    | 2.56 ± 0.74                       |
| Emissions Rate Facility/Other (tonnes hr <sup>-1</sup> ) |                    |                    |                    | 0.98 ± 0.29                       |
| <b>Emissions Rate Total (tonnes hr<sup>-1</sup>)</b>     | <b>3.65 ± 0.84</b> | <b>3.67 ± 1.14</b> | <b>3.53 ± 0.88</b> | <b>3.54 ± 1.00</b>                |
| Aircraft Transect Count                                  | 12                 | 12                 | 10                 | 10                                |
| Boundary Layer Height (m agl)                            | 700-900            | 700-900            | 600-1000           | 600-1000                          |
| Temperature (°C)                                         | 16.3 ± 4.3         | 16.3 ± 4.3         | 12.7 ± 5.1         | 12.7 ± 5.1                        |
| Wind Speed (m/s)                                         | 2.4 ± 1.9          | 2.4 ± 1.9          | 5.9 ± 2.8          | 5.9 ± 2.8                         |
| Daily Mean Wind Direction (°)                            | 262 ± 35           | 262 ± 35           | 338 ± 59           | 338 ± 59                          |

5

10

**Table S4: Shell Albian and Jackpine (SAJ)**

|                                                          | Aug 21 Box         | Aug 21 Screen*     | Sep 06 Box         | Sep 06 Screen*     |
|----------------------------------------------------------|--------------------|--------------------|--------------------|--------------------|
| Measurement Error (%)                                    | 1                  | 1                  | 1                  | 1                  |
| Wind Error (%)                                           | 1                  | 1                  | 1                  | 1                  |
| Surface Extrapolation (%)                                | 5                  | 7                  | 12                 | 7                  |
| Box-top Height (%)                                       | 8                  |                    | 5                  |                    |
| Box Density Change (%)                                   | 10                 |                    | 16                 |                    |
| Box Vertical Turbulence (%)                              | 5                  |                    | 2                  |                    |
| Box-Top Mixing Ratio (%)                                 | 9                  |                    | 7                  |                    |
| Background Mixing Ratio (%)                              |                    | 27                 |                    | 17                 |
| Screen Screen-Top Height (%)                             |                    | 10                 |                    | 5                  |
| Plume Separation (%)                                     |                    |                    |                    |                    |
| Total Uncertainty Facility (%)                           | 18                 | 30                 | 22                 | 20                 |
| Total Uncertainty Plumes (%)                             |                    |                    |                    |                    |
| Emissions Rate Ponds (tonnes hr <sup>-1</sup> )          |                    |                    |                    |                    |
| Emissions Rate Mines (tonnes hr <sup>-1</sup> )          |                    | 1.44 ± 0.43        |                    | 1.18 ± 0.24        |
| Emissions Rate Facility/Other (tonnes hr <sup>-1</sup> ) |                    |                    |                    |                    |
| <b>Emissions Rate Total (tonnes hr<sup>-1</sup>)</b>     | <b>1.60 ± 0.29</b> | <b>1.44 ± 0.43</b> | <b>1.25 ± 0.28</b> | <b>1.18 ± 0.24</b> |
| Aircraft Transect Count                                  | 10                 | 10                 | 10                 | 10                 |
| Boundary Layer Height (m agl)                            | 1200-1500          | 1200-1500          | 900-1200           | 900-1200           |
| Temperature (°C)                                         | 16.5 ± 3.6         | 16.5 ± 3.6         | 14.8 ± 6.2         | 14.8 ± 6.2         |
| Wind Speed (m/s)                                         | 1.3 ± 0.8          | 1.3 ± 0.8          | 4.3 ± 0.9          | 4.3 ± 0.9          |
| Daily Mean Wind Direction (°)                            | 258 ± 50           | 258 ± 50           | 7 ± 50             | 7 ± 50             |

5

10



**Table S5: Syncrude Aurora (SAU)**

|                           | Aug 29 Box                                               | Aug 29 Screen*     | Sep 06 Screen*     |
|---------------------------|----------------------------------------------------------|--------------------|--------------------|
| Measurement Error (%)     | 1                                                        | 1                  | 1                  |
| Wind Error (%)            | 1                                                        | 1                  | 1                  |
| Surface Extrapolation (%) | 10                                                       | 14                 | 6                  |
| <hr/>                     |                                                          |                    |                    |
| Box                       | Box-top Height (%)                                       | 4                  |                    |
|                           | Density Change (%)                                       | 9                  |                    |
|                           | Vertical Turbulence (%)                                  | 2                  |                    |
|                           | Box-Top Mixing Ratio (%)                                 | 3                  |                    |
| <hr/>                     |                                                          |                    |                    |
| Screen                    | Background Mixing Ratio (%)                              |                    | 11                 |
|                           | Screen-Top Height (%)                                    |                    | 4                  |
|                           | Plume Separation (%)                                     |                    | 13                 |
| <hr/>                     |                                                          |                    |                    |
|                           | Total Uncertainty Facility (%)                           | 15                 | 19                 |
|                           | Total Uncertainty Plumes (%)                             |                    | 20                 |
| <hr/>                     |                                                          |                    |                    |
|                           | Emissions Rate Ponds (tonnes hr <sup>-1</sup> )          |                    |                    |
|                           | Emissions Rate Mines (tonnes hr <sup>-1</sup> )          |                    | 1.29 ± 0.25        |
|                           | Emissions Rate Facility/Other (tonnes hr <sup>-1</sup> ) |                    | 1.56 ± 0.31        |
|                           | <b>Emissions Rate Total (tonnes hr<sup>-1</sup>)</b>     | <b>1.70 ± 0.26</b> | <b>1.29 ± 0.25</b> |
| <hr/>                     |                                                          |                    |                    |
|                           | Aircraft Transect Count                                  | 3                  | 3                  |
|                           | Boundary Layer Height (m agl)                            | 400-500            | 400-500            |
|                           | Temperature (°C)                                         | 15.2 ± 2.4         | 15.2 ± 2.4         |
|                           | Wind Speed (m/s)                                         | 2.3 ± 0.7          | 2.3 ± 0.7          |
|                           | Daily Mean Wind Direction (°)                            | 26 ± 40            | 26 ± 40            |
|                           |                                                          |                    | 7 ± 50             |

5

10

**Table S6: Total Oil Sands Screen**

|        |                                                          | Aug 16 Screen B  |
|--------|----------------------------------------------------------|------------------|
|        | Measurement Error (%)                                    | 1                |
|        | Wind Error (%)                                           | 1                |
|        | Surface Extrapolation (%)                                | 3                |
|        | Box-top Height (%)                                       |                  |
| Box    | Density Change (%)                                       |                  |
|        | Vertical Turbulence (%)                                  |                  |
|        | Box-Top Mixing Ratio (%)                                 |                  |
|        | Background Mixing Ratio (%)                              | 14               |
| Screen | Screen-Top Height (%)                                    | 5                |
|        | Plume Separation (%)                                     |                  |
|        | Total Uncertainty Facility (%)                           | 16               |
|        | Total Uncertainty Plumes (%)                             |                  |
|        | Emissions Rate Ponds (tonnes hr <sup>-1</sup> )          |                  |
|        | Emissions Rate Mines (tonnes hr <sup>-1</sup> )          |                  |
|        | Emissions Rate Facility/Other (tonnes hr <sup>-1</sup> ) |                  |
|        | <b>Emissions Rate Total</b> (tonnes hr <sup>-1</sup> )   | <b>23.6± 3.8</b> |
|        | Aircraft Transect Count                                  | 10               |
|        | Boundary Layer Height (m agl)                            | 400-450          |
|        | Temperature (°C)                                         | 19.5 ± 3.8       |
|        | Wind Speed (m/s)                                         | 2.8 ± 1.0        |
|        | Daily Mean Wind Direction (°)                            | 225 ± 57         |

Figure S1: Background profiles,  $[\text{CH}_4]_{\text{B}}(z)$ , were selected from regions of the interpolated screens away from plume sources, corresponding to 2-20km spatial lengths depending on the flight paths. Error bars are the  $1\sigma$  variability within the 2-20km spatial regions of background air. Background  $\text{CH}_4$  for the vertical regions 150-200m above ground to the surface are estimated based on extrapolations (constant or linear) from the lowest transects to the surface and included in the uncertainty analysis. The lowest aircraft transects usually converged to a constant value (Box 3,5,6,7,9 left to right) or showed a small linear enhancement (Box 2,4,8) which provided best fits to the surface.

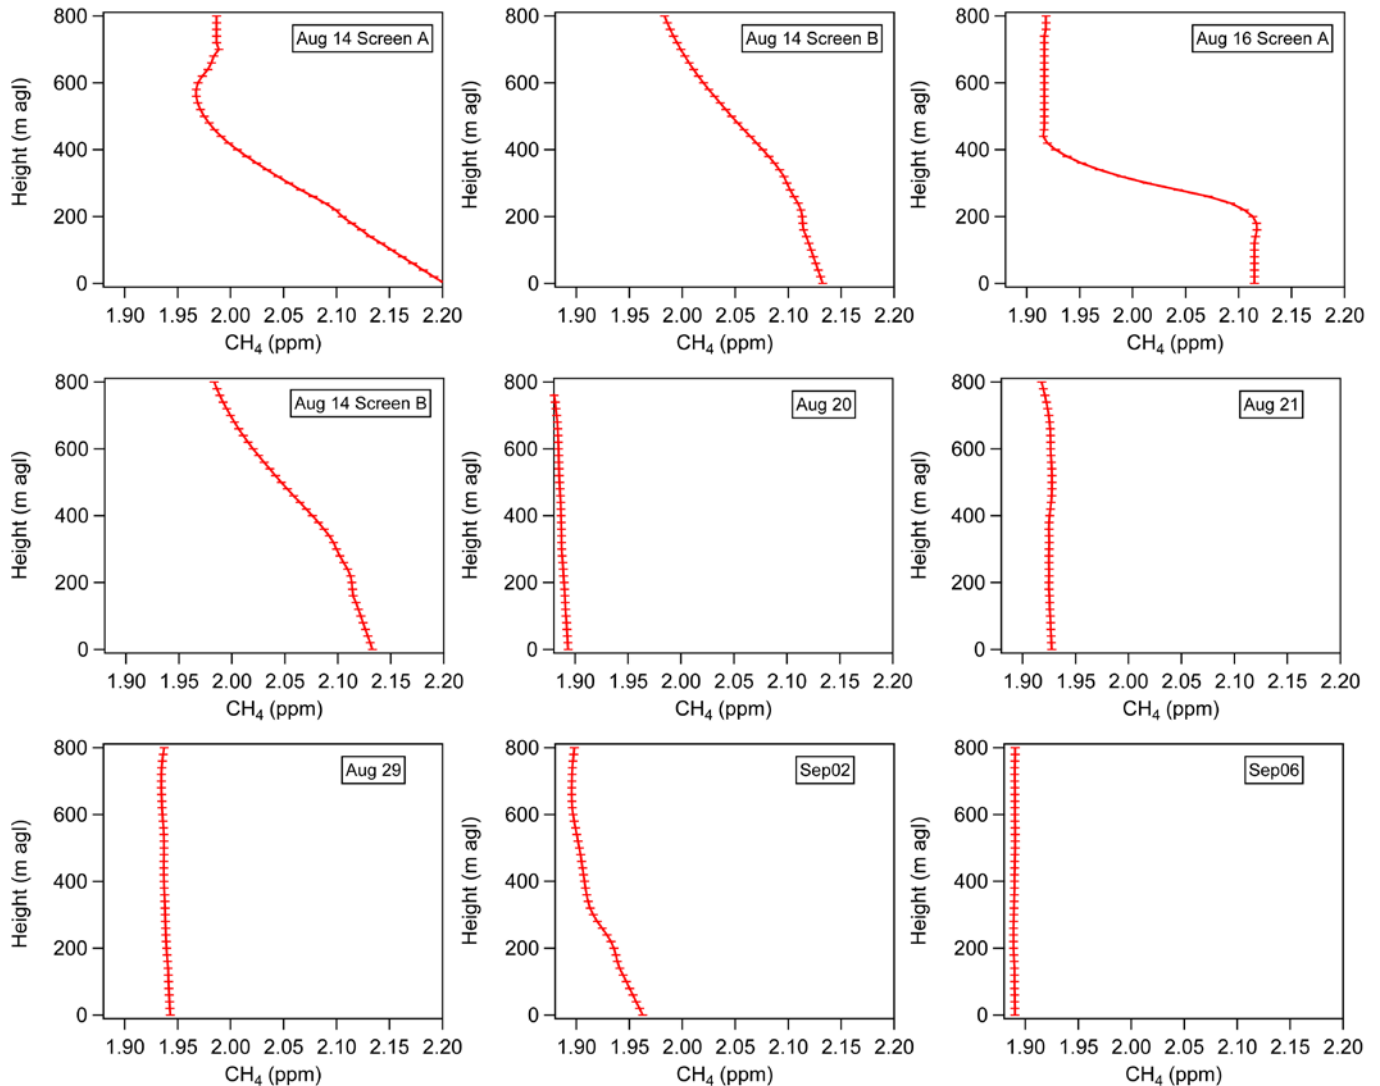

Figure S2: Correlation Plots for Plumes A-D corresponding to Figure 2 (SML Mine, SML Tailings Pond, SUN Tailings Pond, SUN Mine). CH<sub>4</sub> is well correlated with tracer species NO<sub>y</sub>, BC and BTEX for the various sources. Linear coefficients of determination (r<sup>2</sup>) are in the range of 0.44-0.83. The lowest r<sup>2</sup> values are from the CH<sub>4</sub> vs BTEX plot for Plume C and the CH<sub>4</sub> vs NO<sub>y</sub> and CH<sub>4</sub> vs BC plots for Plume D. These two sources correspond to lower emissions and mixing ratios of both CH<sub>4</sub> and the associated species. In the context of our results, this analysis confirms the correlation of CH<sub>4</sub> with various species as shown in Figure 2 which are used to spatially define plume boundaries.

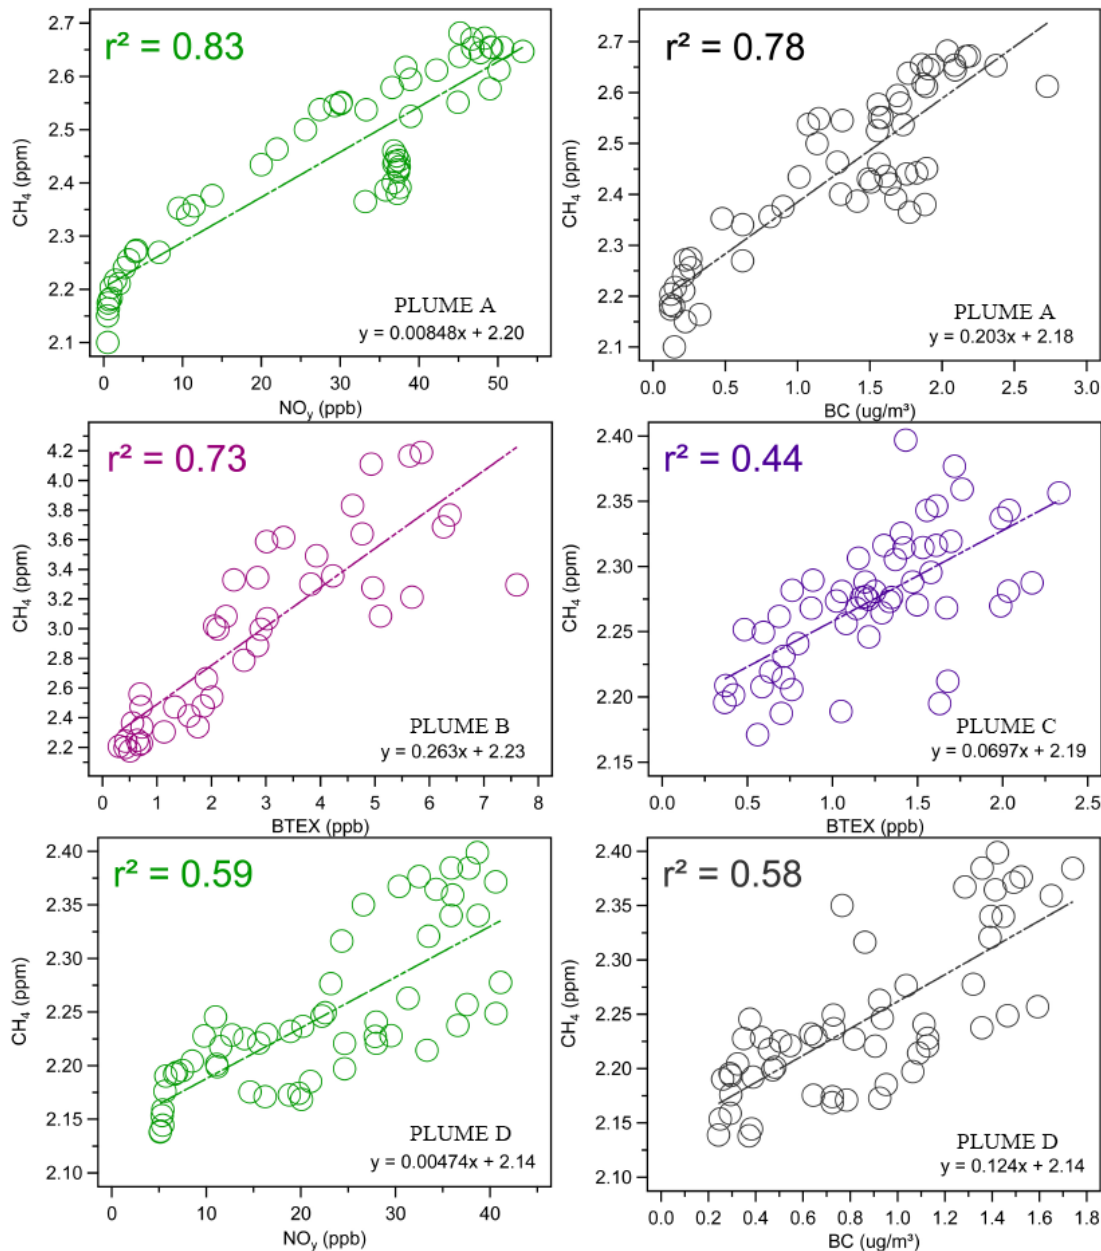

5 Figure S3: Time series plots of methane (red line) and discrete canisters samples analyzed for ethane (blue lines) corresponding to the same plumes used in Table 1 for the ethane/methane ratio calculations. These are a small subset of the canisters that were sampled over the aircraft campaign. These example plumes attempt to isolate known sources from the three facilities and support the conclusion that there were not any significant sources of ethane in the AOSR, in agreement with Simpson et al., 2010.

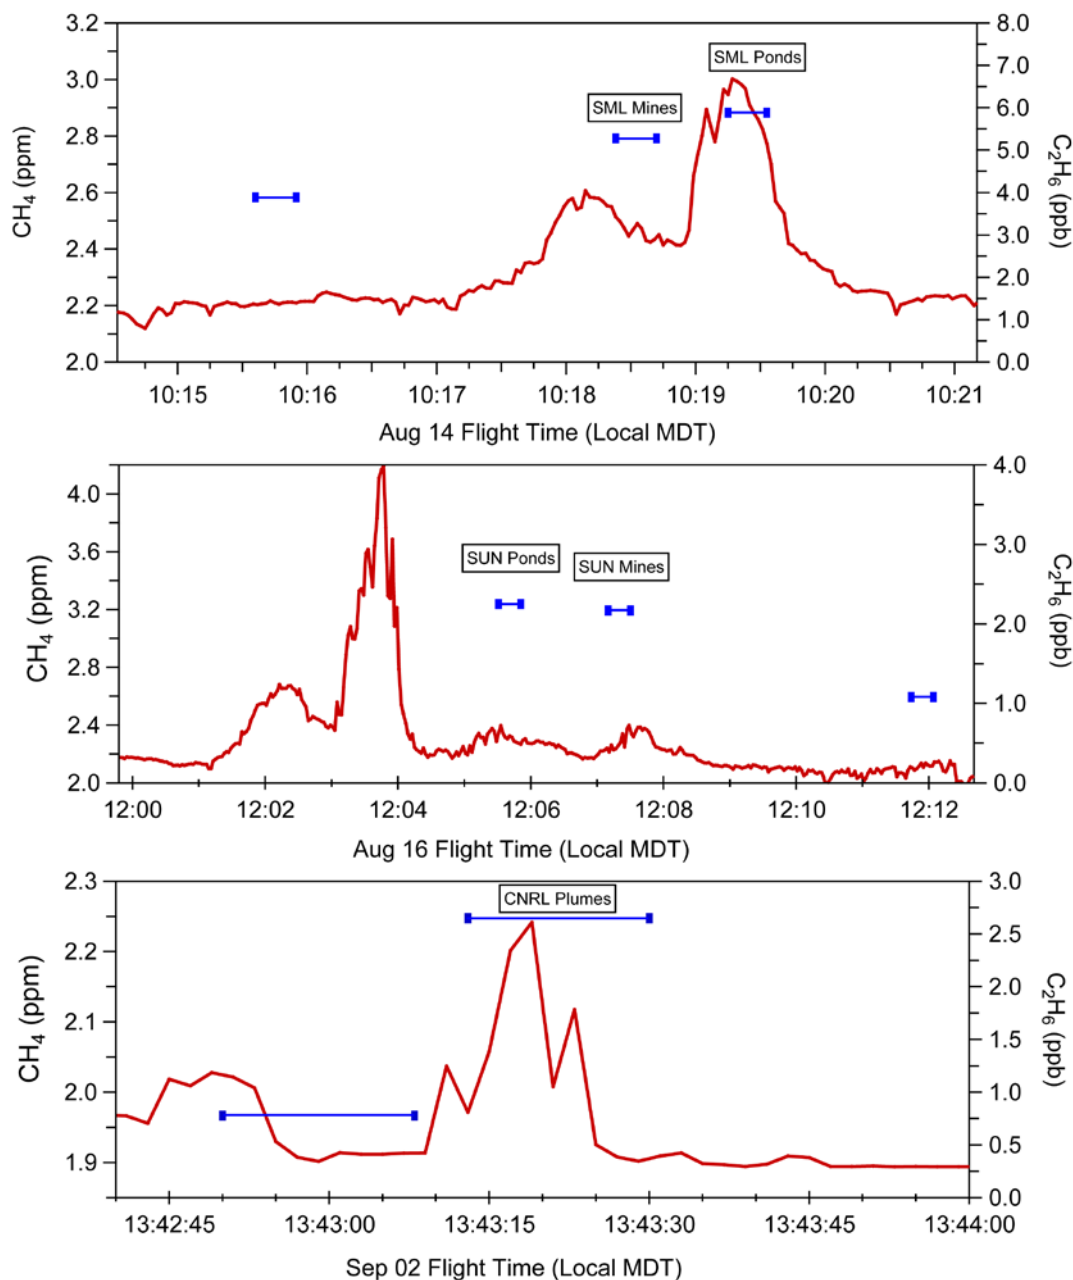

Supplement: Supplementary file 1 [file acp-18-7361-2018-supplement.pdf]
